# Supplementary material
Source: publisher figshare collection journal article supplement (https://tandf.figshare.com/articles/dataset/_/7800965)
Supplement: Supplementary file 2 [file 1]

**Supplemental table S1.** Overview of study details of the EORTC 62043 and 62072 trials.

|                                 | <b>EORTC 62043 trial</b>                                                                                                                                                           | <b>EORTC 62072 trial</b>                                                                                                                                                    |
|---------------------------------|------------------------------------------------------------------------------------------------------------------------------------------------------------------------------------|-----------------------------------------------------------------------------------------------------------------------------------------------------------------------------|
| <b>Type of trial</b>            | Phase II                                                                                                                                                                           | Phase III                                                                                                                                                                   |
| <b>Design</b>                   | Single arm                                                                                                                                                                         | Randomized (2:1), double blind, placebo-controlled                                                                                                                          |
| <b>Drug</b>                     | Pazopanib 800mg daily                                                                                                                                                              | Pazopanib 800mg daily or placebo                                                                                                                                            |
| <b>Inclusion criteria</b>       | Locally advanced/metastatic STS<br><br>Ineligible to chemotherapy or failure to no more than two prior cytotoxic agents (sequentially as single agents or one combination regimen) | Metastatic non-adipocytic STS<br><br>Failure to standard chemotherapy (including an anthracycline), with a maximum of 4 previous lines or two lines of combination regimens |
| <b>Primary outcome</b>          | Progression-free survival at 12 weeks                                                                                                                                              | Progression-free survival                                                                                                                                                   |
| <b>Secondary outcome</b>        | Response rate<br>Duration of response<br>Safety<br>Overall survival                                                                                                                | Overall survival<br>Response rate<br>Safety<br>Quality of life                                                                                                              |
| <b>ClinicalTrial.gov number</b> | NCT00297258                                                                                                                                                                        | NCT00753688                                                                                                                                                                 |
| <b>Reference</b>                | Sleijfer et al., JCO, 2009                                                                                                                                                         | van der Graaf et al., Lancet, 2012                                                                                                                                          |

**Supplemental table S2.** Complete results of the multivariate Cox regression models for PFS and OS of patients receiving pazopanib with and without cardiotoxicity grade 3-4 at landmark time point of 60 days.

| Landmark Analysis at t=60 days        |                  | Multivariate Cox model of progression-free survival |                         |                       |              | Multivariate Cox model of overall survival |                         |                       |              |
|---------------------------------------|------------------|-----------------------------------------------------|-------------------------|-----------------------|--------------|--------------------------------------------|-------------------------|-----------------------|--------------|
| Covariates                            |                  | Patients (N=257)                                    | Observed Events (O=246) | Hazard Ratio (95% CI) | Wald p-value | Patients (N=311)                           | Observed Events (O=244) | Hazard Ratio (95% CI) | Wald p-value |
| Cardiotoxic Adverse Event (Grade 3-4) | No               | 242 (94.2)                                          | 231 (93.9)              | 1.00                  | 0.897        | 294 (94.5)                                 | 231 (94.7)              | 1.00                  | 0.801        |
|                                       | Yes              | 15 (5.8)                                            | 15 (6.1)                | 0.97 (0.57, 1.64)     |              | 17 (5.5)                                   | 13 (5.3)                | 0.93 (0.52, 1.65)     |              |
| Performance status                    | 0                | 145 (56.4)                                          | 139 (56.5)              | 1.00                  | 0.403        | 165 (53.1)                                 | 123 (50.4)              | 1.00                  | <.001        |
|                                       | 1                | 112 (43.6)                                          | 107 (43.5)              | 0.90 (0.69, 1.16)     |              | 146 (46.9)                                 | 121 (49.6)              | 1.58 (1.22, 2.04)     |              |
| Gender                                | Male             | 101 (39.3)                                          | 98 (39.8)               | 1.00                  | 0.027        | 126 (40.5)                                 | 106 (43.4)              | 1.00                  | 0.129        |
|                                       | Female           | 156 (60.7)                                          | 148 (60.2)              | 0.74 (0.56, 0.97)     |              | 185 (59.5)                                 | 138 (56.6)              | 0.81 (0.62, 1.06)     |              |
| Tumor grade                           | Low              | 24 (9.3)                                            | 19 (7.7)                | 1.00                  | 0.002        | 28 (9.0)                                   | 16 (6.6)                | 1.00                  | 0.013        |
|                                       | Intermediate     | 87 (33.9)                                           | 85 (34.6)               | 2.35 (1.43, 3.84)     |              | 105 (33.8)                                 | 85 (34.8)               | 2.04 (1.21, 3.43)     |              |
|                                       | High             | 146 (56.8)                                          | 142 (57.7)              | 1.79 (1.08, 2.97)     |              | 178 (57.2)                                 | 143 (58.6)              | 1.59 (0.93, 2.73)     |              |
| Histology subtype                     | Leiomyosarcoma   | 106 (41.2)                                          | 104 (42.3)              | 1.00                  | 0.182        | 129 (41.5)                                 | 97 (39.8)               | 1.00                  | 0.009        |
|                                       | Synovial sarcoma | 50 (19.5)                                           | 47 (19.1)               | 0.76 (0.57, 1.02)     |              | 60 (19.3)                                  | 50 (20.5)               | 1.36 (1.01, 1.84)     |              |
|                                       | Other sarcoma    | 101 (39.3)                                          | 95 (38.6)               | 0.91 (0.63, 1.31)     |              | 122 (39.2)                                 | 97 (39.8)               | 1.81 (1.23, 2.66)     |              |
| Age at randomization                  | ≤50 years        | 101 (39.3)                                          | 94 (38.2)               | 1.00                  | 0.048        | 122 (39.2)                                 | 93 (38.1)               | 1.00                  | 0.035        |
|                                       | >50 years        | 156 (60.7)                                          | 152 (61.8)              | 1.34 (1.00, 1.79)     |              | 189 (60.8)                                 | 151 (61.9)              | 1.37 (1.02, 1.83)     |              |
| Cardiac history                       | No               | 194 (75.5)                                          | 186 (75.6)              | 1.00                  | 0.303        | 233 (74.9)                                 | 182 (74.6)              | 1.00                  | 0.539        |
|                                       | Yes              | 63 (24.5)                                           | 60 (24.4)               | 0.85 (0.61, 1.16)     |              | 78 (25.1)                                  | 62 (25.4)               | 1.11 (0.80, 1.52)     |              |

**Supplemental table S3.** Complete results of the multivariate Cox regression models for PFS and OS of patients receiving pazopanib with and without cardiotoxicity of any grade at landmark time point of 60 days.

| Landmark Analysis at t=60 days        |                  | Multivariate Cox model of progression-free survival |                         |                       |              | Multivariate Cox model of overall survival |                         |                       |              |
|---------------------------------------|------------------|-----------------------------------------------------|-------------------------|-----------------------|--------------|--------------------------------------------|-------------------------|-----------------------|--------------|
| Covariates                            |                  | Patients (N=257)                                    | Observed Events (O=246) | Hazard Ratio (95% CI) | Wald p-value | Patients (N=311)                           | Observed Events (O=244) | Hazard Ratio (95% CI) | Wald p-value |
| Cardiotoxic Adverse Event (Any grade) | No               | 151 (58.8)                                          | 144 (58.5)              | 1.00                  | 0.380        | 190 (61.1)                                 | 155 (63.5)              | 1.00                  | 0.120        |
|                                       | Yes              | 106 (41.2)                                          | 102 (41.5)              | 1.12 (0.87, 1.46)     |              | 121 (38.9)                                 | 89 (36.5)               | 0.81 (0.63, 1.06)     |              |
| Performance status                    | 0                | 145 (56.4)                                          | 139 (56.5)              | 1.00                  | 0.415        | 165 (53.1)                                 | 123 (50.4)              | 1.00                  | <0.001       |
|                                       | 1                | 112 (43.6)                                          | 107 (43.5)              | 0.90 (0.69, 1.16)     |              | 146 (46.9)                                 | 121 (49.6)              | 1.57 (1.21, 2.03)     |              |
| Gender                                | Male             | 101 (39.3)                                          | 98 (39.8)               | 1.00                  | 0.027        | 126 (40.5)                                 | 106 (43.4)              | 1.00                  | 0.121        |
|                                       | Female           | 156 (60.7)                                          | 148 (60.2)              | 0.74 (0.56, 0.97)     |              | 185 (59.5)                                 | 138 (56.6)              | 0.81 (0.62, 1.06)     |              |
| Tumor grade                           | Low              | 24 (9.3)                                            | 19 (7.7)                | 1.00                  | 0.001        | 28 (9.0)                                   | 16 (6.6)                | 1.00                  | 0.023        |
|                                       | Intermediate     | 87 (33.9)                                           | 85 (34.6)               | 2.40 (1.46, 3.95)     |              | 105 (33.8)                                 | 85 (34.8)               | 1.93 (1.14, 3.26)     |              |
|                                       | High             | 146 (56.8)                                          | 142 (57.7)              | 1.84 (1.10, 3.06)     |              | 178 (57.2)                                 | 143 (58.6)              | 1.51 (0.88, 2.60)     |              |
| Histology subtype                     | Leiomyosarcoma   | 106 (41.2)                                          | 104 (42.3)              | 1.00                  | 0.222        | 129 (41.5)                                 | 97 (39.8)               | 1.00                  | 0.013        |
|                                       | Synovial sarcoma | 50 (19.5)                                           | 47 (19.1)               | 0.77 (0.58, 1.04)     |              | 60 (19.3)                                  | 50 (20.5)               | 1.33 (0.98, 1.80)     |              |
|                                       | Other sarcoma    | 101 (39.3)                                          | 95 (38.6)               | 0.92 (0.63, 1.32)     |              | 122 (39.2)                                 | 97 (39.8)               | 1.76 (1.20, 2.58)     |              |
| Age at randomization                  | ≤50 years        | 101 (39.3)                                          | 94 (38.2)               | 1.00                  | 0.056        | 122 (39.2)                                 | 93 (38.1)               | 1.00                  | 0.019        |
|                                       | >50 years        | 156 (60.7)                                          | 152 (61.8)              | 1.33 (0.99, 1.78)     |              | 189 (60.8)                                 | 151 (61.9)              | 1.42 (1.06, 1.91)     |              |
| Cardiac history                       | No               | 194 (75.5)                                          | 186 (75.6)              | 1.00                  | 0.273        | 233 (74.9)                                 | 182 (74.6)              | 1.00                  | 0.570        |
|                                       | Yes              | 63 (24.5)                                           | 60 (24.4)               | 0.84 (0.61, 1.15)     |              | 78 (25.1)                                  | 62 (25.4)               | 1.10 (0.80, 1.50)     |              |

**Supplemental table S4.** Complete results of the multivariate Cox regression models for PFS and OS of patients receiving placebo with and without cardiotoxicity of any grade at landmark time point of 60 days.

| Landmark Analysis at t=60 days        |                  | Multivariate Cox model of progression-free survival |                        |                       |              | Multivariate Cox model of overall survival |                        |                       |              |
|---------------------------------------|------------------|-----------------------------------------------------|------------------------|-----------------------|--------------|--------------------------------------------|------------------------|-----------------------|--------------|
| Covariates                            |                  | Patients (N=41)                                     | Observed Events (O=41) | Hazard Ratio (95% CI) | Wald p-value | Patients (N=101)                           | Observed Events (O=75) | Hazard Ratio (95% CI) | Wald p-value |
| Cardiotoxic Adverse Event (Any grade) | No               | 36 (87.8)                                           | 36 (87.8)              | 1.00                  | 0.301        | 93 (92.1)                                  | 68 (90.7)              | 1.00                  | 0.988        |
|                                       | Yes              | 5 (12.2)                                            | 5 (12.2)               | 0.52 (0.15, 1.79)     |              | 8 (7.9)                                    | 7 (9.3)                | 1.01 (0.41, 2.46)     |              |
| Performance status                    | 0                | 22 (53.7)                                           | 22 (53.7)              | 1.00                  | 0.261        | 48 (47.5)                                  | 33 (44.0)              | 1.00                  | 0.034        |
|                                       | 1                | 19 (46.3)                                           | 19 (46.3)              | 1.54 (0.73, 3.25)     |              | 53 (52.5)                                  | 42 (56.0)              | 1.76 (1.04, 2.96)     |              |
| Gender                                | Male             | 15 (36.6)                                           | 15 (36.6)              | 1.00                  | 0.012        | 41 (40.6)                                  | 31 (41.3)              | 1.00                  | 0.801        |
|                                       | Female           | 26 (63.4)                                           | 26 (63.4)              | 0.29 (0.11, 0.76)     |              | 60 (59.4)                                  | 44 (58.7)              | 0.93 (0.55, 1.59)     |              |
| Tumor grade                           | Low              | 2 (4.9)                                             | 2 (4.9)                | 1.00                  | 0.004        | 3 (3.0)                                    | 2 (2.7)                | 1.00                  | 0.218        |
|                                       | Intermediate     | 13 (31.7)                                           | 13 (31.7)              | 10.01 (1.42, 70.42)   |              | 25 (24.8)                                  | 17 (22.7)              | 2.12 (0.49, 9.17)     |              |
|                                       | High             | 26 (63.4)                                           | 26 (63.4)              | 34.89 (3.61, 337.59)  |              | 73 (72.3)                                  | 56 (74.7)              | 1.37 (0.29, 6.49)     |              |
| Histology subtype                     | Leiomyosarcoma   | 19 (46.3)                                           | 19 (46.3)              | 1.00                  | 0.021        | 42 (41.6)                                  | 31 (41.3)              | 1.00                  | 0.964        |
|                                       | Synovial sarcoma | 3 (7.3)                                             | 3 (7.3)                | 7.92 (1.72, 36.51)    |              | 11 (10.9)                                  | 7 (9.3)                | 0.94 (0.38, 2.35)     |              |
|                                       | Other sarcoma    | 19 (46.3)                                           | 19 (46.3)              | 1.02 (0.44, 2.34)     |              | 48 (47.5)                                  | 37 (49.3)              | 1.05 (0.62, 1.77)     |              |
| Age at randomization                  | ≤50 years        | 19 (46.3)                                           | 19 (46.3)              | 1.00                  | 0.703        | 50 (49.5)                                  | 34 (45.3)              | 1.00                  | 0.114        |
|                                       | >50 years        | 22 (53.7)                                           | 22 (53.7)              | 1.17 (0.53, 2.60)     |              | 51 (50.5)                                  | 41 (54.7)              | 1.57 (0.90, 2.76)     |              |
| Cardiac history                       | No               | 27 (65.9)                                           | 27 (65.9)              | 1.00                  | 0.203        | 68 (67.3)                                  | 51 (68.0)              | 1.00                  | 0.234        |
|                                       | Yes              | 14 (34.1)                                           | 14 (34.1)              | 1.70 (0.75, 3.85)     |              | 33 (32.7)                                  | 24 (32.0)              | 0.70 (0.40, 1.25)     |              |

**Supplemental table S5.** Complete results of the multivariate Cox regression models for PFS and OS of patients receiving pazopanib with and without proteinuria at landmark time point of 60 days.

| <b>Landmark Analysis at t=60 days</b> |                         | <b>Multivariate Cox model of progression-free survival</b> |                                |                              |                     | <b>Multivariate Cox model of overall survival</b> |                                |                              |                     |
|---------------------------------------|-------------------------|------------------------------------------------------------|--------------------------------|------------------------------|---------------------|---------------------------------------------------|--------------------------------|------------------------------|---------------------|
| <b>Covariates</b>                     |                         | <b>Patients (N=257)</b>                                    | <b>Observed Events (O=246)</b> | <b>Hazard Ratio (95% CI)</b> | <b>Wald p-value</b> | <b>Patients (N=311)</b>                           | <b>Observed Events (O=244)</b> | <b>Hazard Ratio (95% CI)</b> | <b>Wald p-value</b> |
| <b>Proteinuria</b>                    | <b>No</b>               | 194 (75.5)                                                 | 186 (75.6)                     | 1.00                         | 0.953               | 237 (76.2)                                        | 182 (74.6)                     | 1.00                         | 0.196               |
|                                       | <b>Yes</b>              | 63 (24.5)                                                  | 60 (24.4)                      | 1.01 (0.75, 1.36)            |                     | 74 (23.8)                                         | 62 (25.4)                      | 1.22 (0.90, 1.64)            |                     |
| <b>Performance status</b>             | <b>0</b>                | 145 (56.4)                                                 | 139 (56.5)                     | 1.00                         | 0.400               | 165 (53.1)                                        | 123 (50.4)                     | 1.00                         | 0.001               |
|                                       | <b>1</b>                | 112 (43.6)                                                 | 107 (43.5)                     | 0.89 (0.69, 1.16)            |                     | 146 (46.9)                                        | 121 (49.6)                     | 1.53 (1.18, 1.99)            |                     |
| <b>Gender</b>                         | <b>Male</b>             | 101 (39.3)                                                 | 98 (39.8)                      | 1.00                         | 0.028               | 126 (40.5)                                        | 106 (43.4)                     | 1.00                         | 0.114               |
|                                       | <b>Female</b>           | 156 (60.7)                                                 | 148 (60.2)                     | 0.74 (0.56, 0.97)            |                     | 185 (59.5)                                        | 138 (56.6)                     | 0.81 (0.62, 1.05)            |                     |
| <b>Tumor grade</b>                    | <b>Low</b>              | 24 (9.3)                                                   | 19 (7.7)                       | 1.00                         | 0.002               | 28 (9.0)                                          | 16 (6.6)                       | 1.00                         | 0.017               |
|                                       | <b>Intermediate</b>     | 87 (33.9)                                                  | 85 (34.6)                      | 2.34 (1.43, 3.82)            |                     | 105 (33.8)                                        | 85 (34.8)                      | 2.00 (1.18, 3.37)            |                     |
|                                       | <b>High</b>             | 146 (56.8)                                                 | 142 (57.7)                     | 1.79 (1.08, 2.98)            |                     | 178 (57.2)                                        | 143 (58.6)                     | 1.58 (0.92, 2.70)            |                     |
| <b>Histology subtype</b>              | <b>Leiomyosarcoma</b>   | 106 (41.2)                                                 | 104 (42.3)                     | 1.00                         | 0.203               | 129 (41.5)                                        | 97 (39.8)                      | 1.00                         | 0.011               |
|                                       | <b>Synovial sarcoma</b> | 50 (19.5)                                                  | 47 (19.1)                      | 0.77 (0.58, 1.03)            |                     | 60 (19.3)                                         | 50 (20.5)                      | 1.33 (0.98, 1.79)            |                     |
|                                       | <b>Other sarcoma</b>    | 101 (39.3)                                                 | 95 (38.6)                      | 0.93 (0.64, 1.34)            |                     | 122 (39.2)                                        | 97 (39.8)                      | 1.76 (1.21, 2.57)            |                     |
| <b>Age at randomization</b>           | <b>≤50 years</b>        | 101 (39.3)                                                 | 94 (38.2)                      | 1.00                         | 0.089               | 122 (39.2)                                        | 93 (38.1)                      | 1.00                         | 0.028               |
|                                       | <b>&gt;50 years</b>     | 156 (60.7)                                                 | 152 (61.8)                     | 1.27 (0.96, 1.67)            |                     | 189 (60.8)                                        | 151 (61.9)                     | 1.37 (1.03, 1.82)            |                     |

**Supplemental table S6.** Complete results of the multivariate Cox regression models for PFS and OS of patients receiving pazopanib with and without persistent proteinuria at landmark time point of 60 days.

| <b><u>Landmark Analysis at t=60 days</u></b> |                         | <b>Multivariate Cox model of progression-free survival</b> |                                |                              |                     | <b>Multivariate Cox model of overall survival</b> |                                |                              |                     |
|----------------------------------------------|-------------------------|------------------------------------------------------------|--------------------------------|------------------------------|---------------------|---------------------------------------------------|--------------------------------|------------------------------|---------------------|
| <b>Covariates</b>                            |                         | <b>Patients (N=257)</b>                                    | <b>Observed Events (O=246)</b> | <b>Hazard Ratio (95% CI)</b> | <b>Wald p-value</b> | <b>Patients (N=311)</b>                           | <b>Observed Events (O=244)</b> | <b>Hazard Ratio (95% CI)</b> | <b>Wald p-value</b> |
| <b>Persistent proteinuria</b>                | <b>No</b>               | 235 (91.4)                                                 | 225 (91.5)                     | 1.00                         | 0.937               | 285 (91.6)                                        | 223 (91.4)                     | 1.00                         | 0.169               |
|                                              | <b>Yes</b>              | 22 (8.6)                                                   | 21 (8.5)                       | 0.98 (0.62, 1.55)            |                     | 26 (8.4)                                          | 21 (8.6)                       | 1.38 (0.87, 2.19)            |                     |
| <b>Performance status</b>                    | <b>0</b>                | 145 (56.4)                                                 | 139 (56.5)                     | 1.00                         | 0.408               | 165 (53.1)                                        | 123 (50.4)                     | 1.00                         | <.001               |
|                                              | <b>1</b>                | 112 (43.6)                                                 | 107 (43.5)                     | 0.90 (0.69, 1.16)            |                     | 146 (46.9)                                        | 121 (49.6)                     | 1.55 (1.20, 2.01)            |                     |
| <b>Gender</b>                                | <b>Male</b>             | 101 (39.3)                                                 | 98 (39.8)                      | 1.00                         | 0.028               | 126 (40.5)                                        | 106 (43.4)                     | 1.00                         | 0.121               |
|                                              | <b>Female</b>           | 156 (60.7)                                                 | 148 (60.2)                     | 0.74 (0.56, 0.97)            |                     | 185 (59.5)                                        | 138 (56.6)                     | 0.81 (0.62, 1.06)            |                     |
| <b>Tumor grade</b>                           | <b>Low</b>              | 24 (9.3)                                                   | 19 (7.7)                       | 1.00                         | 0.002               | 28 (9.0)                                          | 16 (6.6)                       | 1.00                         | 0.015               |
|                                              | <b>Intermediate</b>     | 87 (33.9)                                                  | 85 (34.6)                      | 2.34 (1.43, 3.83)            |                     | 105 (33.8)                                        | 85 (34.8)                      | 2.01 (1.20, 3.40)            |                     |
|                                              | <b>High</b>             | 146 (56.8)                                                 | 142 (57.7)                     | 1.79 (1.08, 2.98)            |                     | 178 (57.2)                                        | 143 (58.6)                     | 1.58 (0.92, 2.71)            |                     |
| <b>Histology subtype</b>                     | <b>Leiomyosarcoma</b>   | 106 (41.2)                                                 | 104 (42.3)                     | 1.00                         | 0.203               | 129 (41.5)                                        | 97 (39.8)                      | 1.00                         | 0.010               |
|                                              | <b>Synovial sarcoma</b> | 50 (19.5)                                                  | 47 (19.1)                      | 0.77 (0.58, 1.03)            |                     | 60 (19.3)                                         | 50 (20.5)                      | 1.78 (1.22, 2.59)            |                     |
|                                              | <b>Other sarcoma</b>    | 101 (39.3)                                                 | 95 (38.6)                      | 0.93 (0.64, 1.34)            |                     | 122 (39.2)                                        | 97 (39.8)                      | 1.34 (0.99, 1.80)            |                     |
| <b>Age at randomization</b>                  | <b>≤50 years</b>        | 101 (39.3)                                                 | 94 (38.2)                      | 1.00                         | 0.087               | 122 (39.2)                                        | 93 (38.1)                      | 1.00                         | 0.031               |
|                                              | <b>&gt;50 years</b>     | 156 (60.7)                                                 | 152 (61.8)                     | 1.27 (0.97, 1.68)            |                     | 189 (60.8)                                        | 151 (61.9)                     | 1.37 (1.03, 1.82)            |                     |

**Supplemental table S7.** Complete results of the multivariate Cox regression models for PFS and OS of patients receiving placebo with and without proteinuria at landmark time point of 60 days.

| <b><u>Landmark Analysis at t=60 days</u></b> |                         | <b>Multivariate Cox model of progression-free survival</b> |                               |                              |                     | <b>Multivariate Cox model of overall survival</b> |                               |                              |                     |
|----------------------------------------------|-------------------------|------------------------------------------------------------|-------------------------------|------------------------------|---------------------|---------------------------------------------------|-------------------------------|------------------------------|---------------------|
| <b>Covariates</b>                            |                         | <b>Patients (N=41)</b>                                     | <b>Observed Events (O=41)</b> | <b>Hazard Ratio (95% CI)</b> | <b>Wald p-value</b> | <b>Patients (N=101)</b>                           | <b>Observed Events (O=75)</b> | <b>Hazard Ratio (95% CI)</b> | <b>Wald p-value</b> |
| <b>Proteinuria</b>                           | <b>No</b>               | 32 (78.0)                                                  | 32 (78.0)                     | 1.00                         | 0.244               | 82 (81.2)                                         | 62 (82.7)                     | 1.00                         | 0.324               |
|                                              | <b>Yes</b>              | 9 (22.0)                                                   | 9 (22.0)                      | 1.78 (0.67, 4.69)            |                     | 19 (18.8)                                         | 13 (17.3)                     | 0.73 (0.39, 1.37)            |                     |
| <b>Performance status</b>                    | <b>0</b>                | 22 (53.7)                                                  | 22 (53.7)                     | 1.00                         | 0.128               | 48 (47.5)                                         | 33 (44.0)                     | 1.00                         | 0.055               |
|                                              | <b>1</b>                | 19 (46.3)                                                  | 19 (46.3)                     | 1.77 (0.85, 3.70)            |                     | 53 (52.5)                                         | 42 (56.0)                     | 1.58 (0.99, 2.54)            |                     |
| <b>Gender</b>                                | <b>Male</b>             | 15 (36.6)                                                  | 15 (36.6)                     | 1.00                         | 0.050               | 41 (40.6)                                         | 31 (41.3)                     | 1.00                         | 0.564               |
|                                              | <b>Female</b>           | 26 (63.4)                                                  | 26 (63.4)                     | 0.44 (0.19, 1.00)            |                     | 60 (59.4)                                         | 44 (58.7)                     | 0.86 (0.53, 1.42)            |                     |
| <b>Tumor grade</b>                           | <b>Low</b>              | 2 (4.9)                                                    | 2 (4.9)                       | 1.00                         | 0.016               | 3 (3.0)                                           | 2 (2.7)                       | 1.00                         | 0.298               |
|                                              | <b>Intermediate</b>     | 13 (31.7)                                                  | 13 (31.7)                     | 6.59 (1.10, 39.46)           |                     | 25 (24.8)                                         | 17 (22.7)                     | 2.18 (0.51, 9.35)            |                     |
|                                              | <b>High</b>             | 26 (63.4)                                                  | 26 (63.4)                     | 16.82 (2.18, 129.84)         |                     | 73 (72.3)                                         | 56 (74.7)                     | 1.53 (0.32, 7.18)            |                     |
| <b>Histology subtype</b>                     | <b>Leiomyosarcoma</b>   | 19 (46.3)                                                  | 19 (46.3)                     | 1.00                         | 0.011               | 42 (41.6)                                         | 31 (41.3)                     | 1.00                         | 0.841               |
|                                              | <b>Synovial sarcoma</b> | 3 (7.3)                                                    | 3 (7.3)                       | 0.73 (0.34, 1.60)            |                     | 11 (10.9)                                         | 7 (9.3)                       | 0.89 (0.36, 2.21)            |                     |
|                                              | <b>Other sarcoma</b>    | 19 (46.3)                                                  | 19 (46.3)                     | 7.20 (1.60, 32.28)           |                     | 48 (47.5)                                         | 37 (49.3)                     | 1.11 (0.66, 1.88)            |                     |
| <b>Age at randomization</b>                  | <b>≤50 years</b>        | 19 (46.3)                                                  | 19 (46.3)                     | 1.00                         | 0.921               | 50 (49.5)                                         | 34 (45.3)                     | 1.00                         | 0.123               |
|                                              | <b>&gt;50 years</b>     | 22 (53.7)                                                  | 22 (53.7)                     | 0.96 (0.43, 2.14)            |                     | 51 (50.5)                                         | 41 (54.7)                     | 1.52 (0.89, 2.60)            |                     |

**Supplemental table S8.** Complete results of the multivariate Cox regression models for PFS and OS of patients receiving pazopanib with and without hypothyroidism at landmark time point of 60 days.

| <b><u>Landmark Analysis at t=60 days</u></b> |                         | <b>Multivariate Cox model of progression-free survival</b> |                                |                              |                     | <b>Multivariate Cox model of overall survival</b> |                                |                              |                     |
|----------------------------------------------|-------------------------|------------------------------------------------------------|--------------------------------|------------------------------|---------------------|---------------------------------------------------|--------------------------------|------------------------------|---------------------|
| <b>Covariates</b>                            |                         | <b>Patients (N=257)</b>                                    | <b>Observed Events (O=246)</b> | <b>Hazard Ratio (95% CI)</b> | <b>Wald p-value</b> | <b>Patients (N=311)</b>                           | <b>Observed Events (O=244)</b> | <b>Hazard Ratio (95% CI)</b> | <b>Wald p-value</b> |
| <b>Hypothyroidism</b>                        | <b>No</b>               | 200 (77.8)                                                 | 191 (77.6)                     | 1.00                         | 0.210               | 247 (79.4)                                        | 198 (81.1)                     | 1.00                         | 0.093               |
|                                              | <b>Yes</b>              | 57 (22.2)                                                  | 55 (22.4)                      | 0.82 (0.61, 1.12)            |                     | 64 (20.6)                                         | 46 (18.9)                      | 0.75 (0.54, 1.05)            |                     |
| <b>Performance status</b>                    | <b>0</b>                | 145 (56.4)                                                 | 139 (56.5)                     | 1.00                         | 0.457               | 165 (53.1)                                        | 123 (50.4)                     | 1.00                         | <.001               |
|                                              | <b>1</b>                | 112 (43.6)                                                 | 107 (43.5)                     | 0.91 (0.70, 1.17)            |                     | 146 (46.9)                                        | 121 (49.6)                     | 1.62 (1.25, 2.10)            |                     |
| <b>Gender</b>                                | <b>Male</b>             | 101 (39.3)                                                 | 98 (39.8)                      | 1.00                         | 0.031               | 126 (40.5)                                        | 106 (43.4)                     | 1.00                         | 0.157               |
|                                              | <b>Female</b>           | 156 (60.7)                                                 | 148 (60.2)                     | 0.74 (0.57, 0.97)            |                     | 185 (59.5)                                        | 138 (56.6)                     | 0.82 (0.63, 1.08)            |                     |
| <b>Tumor grade</b>                           | <b>Low</b>              | 24 (9.3)                                                   | 19 (7.7)                       | 1.00                         | 0.002               | 28 (9.0)                                          | 16 (6.6)                       | 1.00                         | 0.016               |
|                                              | <b>Intermediate</b>     | 87 (33.9)                                                  | 85 (34.6)                      | 2.37 (1.45, 3.87)            |                     | 105 (33.8)                                        | 85 (34.8)                      | 2.01 (1.19, 3.39)            |                     |
|                                              | <b>High</b>             | 146 (56.8)                                                 | 142 (57.7)                     | 1.82 (1.10, 3.03)            |                     | 178 (57.2)                                        | 143 (58.6)                     | 1.59 (0.93, 2.72)            |                     |
| <b>Histology subtype</b>                     | <b>Leiomyosarcoma</b>   | 106 (41.2)                                                 | 104 (42.3)                     | 1.00                         | 0.186               | 129 (41.5)                                        | 97 (39.8)                      | 1.00                         | 0.017               |
|                                              | <b>Synovial sarcoma</b> | 50 (19.5)                                                  | 47 (19.1)                      | 0.76 (0.57, 1.02)            |                     | 60 (19.3)                                         | 50 (20.5)                      | 1.34 (0.99, 1.80)            |                     |
|                                              | <b>Other sarcoma</b>    | 101 (39.3)                                                 | 95 (38.6)                      | 0.91 (0.63, 1.31)            |                     | 122 (39.2)                                        | 97 (39.8)                      | 1.70 (1.17, 2.48)            |                     |
| <b>Age at randomization</b>                  | <b>≤50 years</b>        | 101 (39.3)                                                 | 94 (38.2)                      | 1.00                         | 0.103               | 122 (39.2)                                        | 93 (38.1)                      | 1.00                         | 0.034               |
|                                              | <b>&gt;50 years</b>     | 156 (60.7)                                                 | 152 (61.8)                     | 1.26 (0.95, 1.65)            |                     | 189 (60.8)                                        | 151 (61.9)                     | 1.36 (1.02, 1.80)            |                     |



**Supplemental table S9.** Complete results of the multivariate Cox regression models for PFS and OS of patients receiving placebo with and without hypothyroidism at landmark time point of 60 days.

| <b><u>Landmark Analysis at t=60 days</u></b> |                         | <b>Multivariate Cox model of progression-free survival</b> |                               |                              |                     | <b>Multivariate Cox model of overall survival</b> |                               |                              |                     |
|----------------------------------------------|-------------------------|------------------------------------------------------------|-------------------------------|------------------------------|---------------------|---------------------------------------------------|-------------------------------|------------------------------|---------------------|
| <b>Covariates</b>                            |                         | <b>Patients (N=41)</b>                                     | <b>Observed Events (O=41)</b> | <b>Hazard Ratio (95% CI)</b> | <b>Wald p-value</b> | <b>Patients (N=101)</b>                           | <b>Observed Events (O=75)</b> | <b>Hazard Ratio (95% CI)</b> | <b>Wald p-value</b> |
| <b>Hypothyroidism</b>                        | <b>No</b>               | 31 (75.6)                                                  | 31 (75.6)                     | 1.00                         | 0.557               | 85 (84.2)                                         | 64 (85.3)                     | 1.00                         | 0.765               |
|                                              | <b>Yes</b>              | 10 (24.4)                                                  | 10 (24.4)                     | 1.34 (0.51, 3.55)            |                     | 16 (15.8)                                         | 11 (14.7)                     | 0.90 (0.46, 1.78)            |                     |
| <b>Performance status</b>                    | <b>0</b>                | 22 (53.7)                                                  | 22 (53.7)                     | 1.00                         | 0.149               | 48 (47.5)                                         | 33 (44.0)                     | 1.00                         | 0.059               |
|                                              | <b>1</b>                | 19 (46.3)                                                  | 19 (46.3)                     | 1.75 (0.82, 3.76)            |                     | 53 (52.5)                                         | 42 (56.0)                     | 1.58 (0.98, 2.53)            |                     |
| <b>Gender</b>                                | <b>Male</b>             | 15 (36.6)                                                  | 15 (36.6)                     | 1.00                         | 0.057               | 41 (40.6)                                         | 31 (41.3)                     | 1.00                         | 0.656               |
|                                              | <b>Female</b>           | 26 (63.4)                                                  | 26 (63.4)                     | 0.38 (0.14, 1.03)            |                     | 60 (59.4)                                         | 44 (58.7)                     | 0.89 (0.53, 1.49)            |                     |
| <b>Tumor grade</b>                           | <b>Low</b>              | 2 (4.9)                                                    | 2 (4.9)                       | 1.00                         | 0.015               | 3 (3.0)                                           | 2 (2.7)                       | 1.00                         | 0.242               |
|                                              | <b>Intermediate</b>     | 13 (31.7)                                                  | 13 (31.7)                     | 5.51 (0.97, 31.47)           |                     | 25 (24.8)                                         | 17 (22.7)                     | 2.19 (0.51, 9.37)            |                     |
|                                              | <b>High</b>             | 26 (63.4)                                                  | 26 (63.4)                     | 16.82 (2.11, 134.07)         |                     | 73 (72.3)                                         | 56 (74.7)                     | 1.46 (0.31, 6.81)            |                     |
| <b>Histology subtype</b>                     | <b>Leiomyosarcoma</b>   | 19 (46.3)                                                  | 19 (46.3)                     | 1.00                         | 0.015               | 42 (41.6)                                         | 31 (41.3)                     | 1.00                         | 0.886               |
|                                              | <b>Synovial sarcoma</b> | 3 (7.3)                                                    | 3 (7.3)                       | 0.81 (0.38, 1.73)            |                     | 11 (10.9)                                         | 7 (9.3)                       | 0.89 (0.36, 2.22)            |                     |
|                                              | <b>Other sarcoma</b>    | 19 (46.3)                                                  | 19 (46.3)                     | 7.01 (1.57, 31.23)           |                     | 48 (47.5)                                         | 37 (49.3)                     | 1.08 (0.64, 1.83)            |                     |
| <b>Age at randomization</b>                  | <b>≤50 years</b>        | 19 (46.3)                                                  | 19 (46.3)                     | 1.00                         | 0.640               | 50 (49.5)                                         | 34 (45.3)                     | 1.00                         | 0.187               |
|                                              | <b>&gt;50 years</b>     | 22 (53.7)                                                  | 22 (53.7)                     | 1.19 (0.58, 2.44)            |                     | 51 (50.5)                                         | 41 (54.7)                     | 1.41 (0.85, 2.36)            |                     |
